# Supplementary figures and images for: Isolation and Characterization of Streptococcus mutans Phage as a Possible Treatment Agent for Caries
Source: MDPI journal article supplement (doi:10.3390/v13050825), 2021-05-02

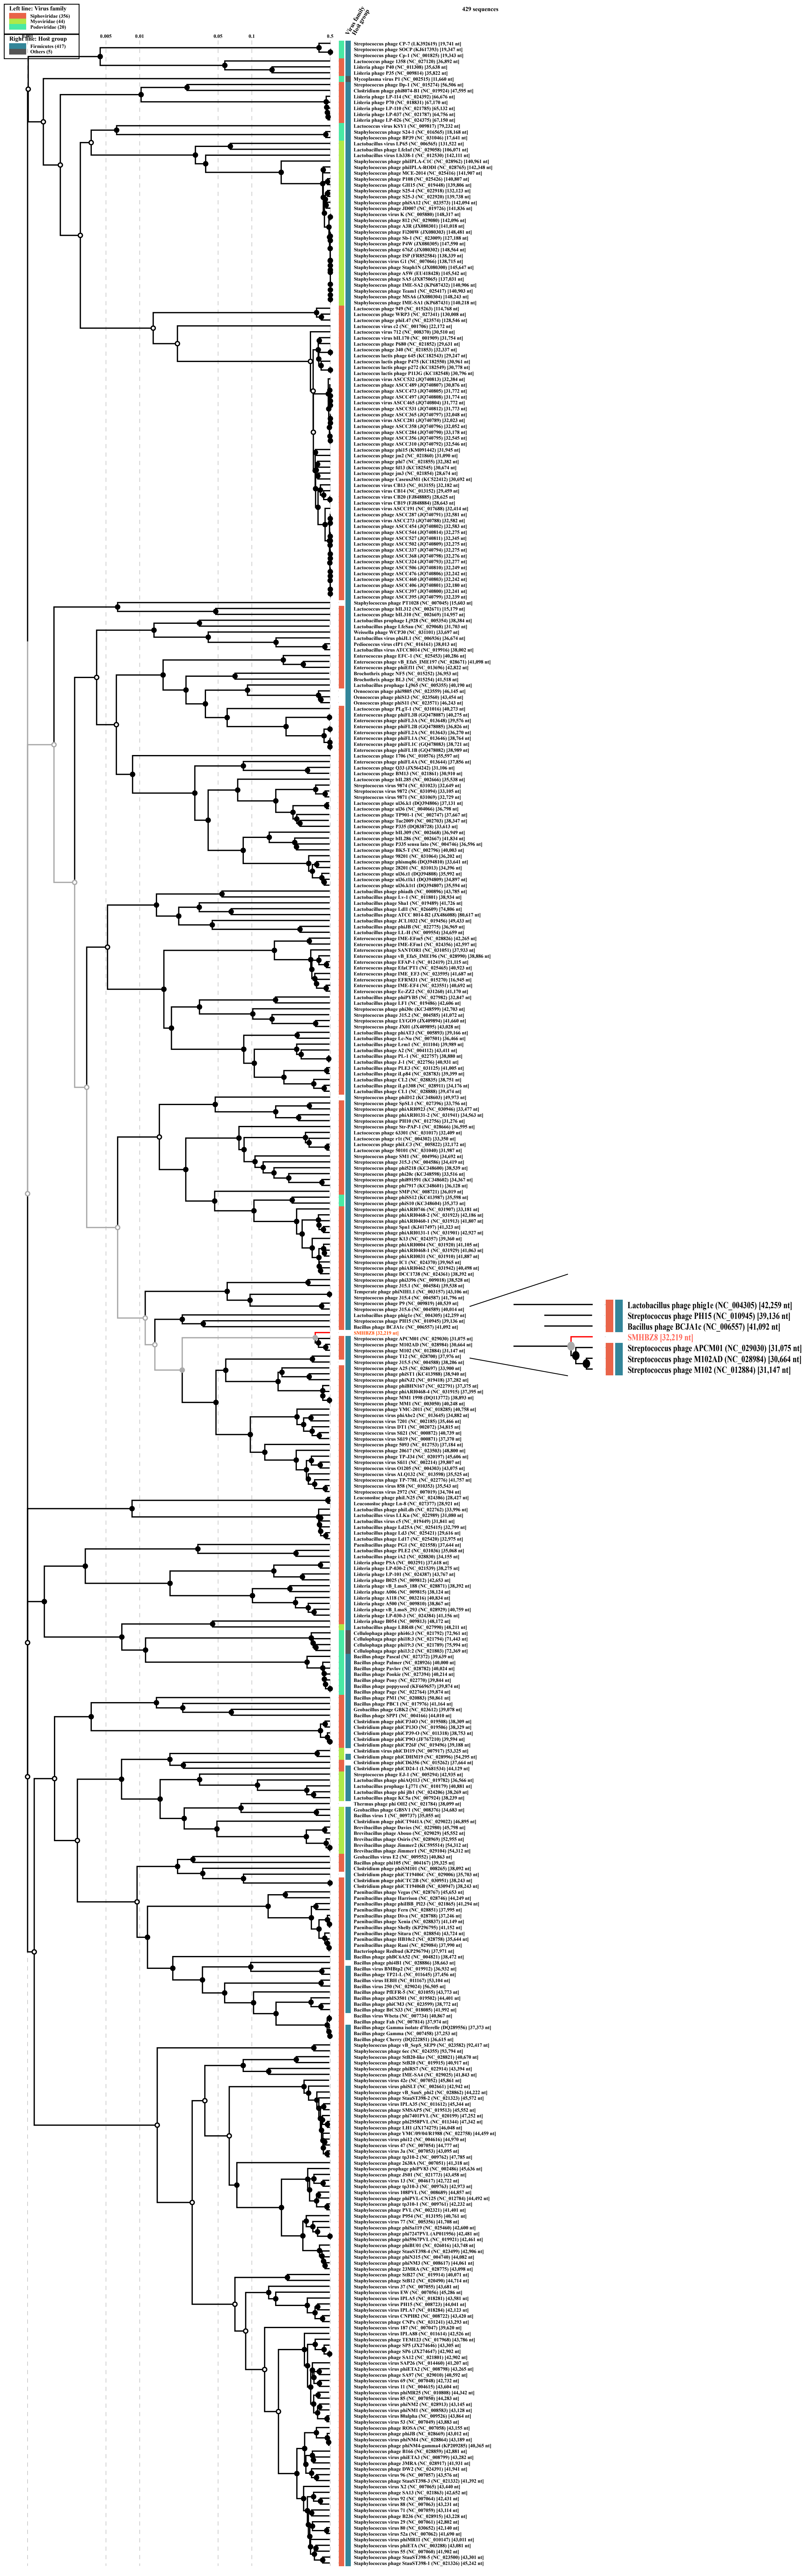

Supplement: s1 [file s1]
